# Supplementary material
Source: PubMed Central journal article supplement (PMC2890450)
Supplement: 0913065107_pnas.200913065SI.pdf [file 0913065107_pnas.200913065SI.pdf]

# Supporting Information

Noton et al. 10.1073/pnas.0913065107

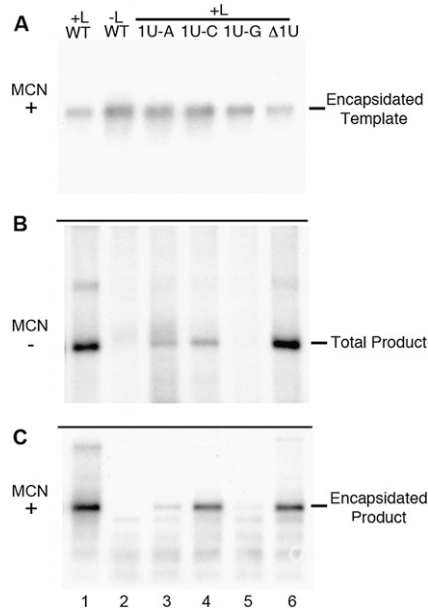

**Fig. S1.** Northern blot analysis to determine impact of mutating the 3' terminal nucleotide of the template on RSV RNA replication. (A) Northern blot analysis of nuclease-resistant negative sense minireplicon RNA expressed by T7 polymerase in MCN-treated RNA samples. (B) Replication products expressed from the mutant minireplicons in total RNA samples (note that because of experimental variation, the  $\Delta 1U$  product levels are somewhat overrepresented in this blot; Fig. S2). (C) Nuclease-resistant minireplicon replication products in MCN-treated RNA samples.
